# Supplementary material
Source: HighWire-hosted journal article supplement (https://rc.rcjournal.com/highwire/filestream/22215/field_highwire_adjunct_files/0/rc-09362-File001.docx)
Supplement: rc-09362-File001.docx [file rc-09362-File001.docx]

**SUPPLEMENTARY APPENDIX**

**Effect of Prone Positioning on Clinical Outcomes of Non-Intubated Subjects with COVID-19: A Comparative Systematic Review and Meta-Analysis**

Azizullah Beran; MD, Mohammed Mhanna; MD, Omar Srour; MD, Hazem, Ayesh; MD, Omar Sajdeya; MD, Sami Ghazaleh; MD, Asmaa S. Mhanna; MD, Dana Ghazaleh; MD, Waleed Khokher; MD, Aadil Maqsood; MD, Ragheb Assaly; MD

**Supplementary tables**

| Title | Page |
| --- | --- |
| Supplementary table 1: Search strategy used in each database searched. | 2 |
| Supplementary table 2: Quality assessment of the included studies. | 3-4 |

**Supplementary figures**

| Title | Page |
| --- | --- |
| Supplementary figure 1: Sensitivity analysis for the need for endotracheal intubation. | 5 |
| Supplementary figure 2: Sensitivity analysis for the mortality. | 6 |

Supplementary table 1: Search strategy used in each database searched.

| Database | Search Strategy | Articles retrieved |
| --- | --- | --- |
| MEDLINE/PUBMED | ("prone position"[MeSH Terms] OR ("prone"[All Fields] AND "position"[All Fields]) OR "prone position"[All Fields]) AND ("covid 19"[All Fields] OR "covid 19"[MeSH Terms] OR "covid 19 vaccines"[All Fields] OR "covid 19 vaccines"[MeSH Terms] OR "covid 19 serotherapy"[All Fields] OR "covid 19 serotherapy"[Supplementary Concept] OR "covid 19 nucleic acid testing"[All Fields] OR "covid 19 nucleic acid testing"[MeSH Terms] OR "covid 19 serological testing"[All Fields] OR "covid 19 serological testing"[MeSH Terms] OR "covid 19 testing"[All Fields] OR "covid 19 testing"[MeSH Terms] OR "sars cov 2"[All Fields] OR "sars cov 2"[MeSH Terms] OR "severe acute respiratory syndrome coronavirus 2"[All Fields] OR "ncov"[All Fields] OR "2019 ncov"[All Fields] OR (("coronavirus"[MeSH Terms] OR "coronavirus"[All Fields] OR "cov"[All Fields]) AND 2019/11/01:3000/12/31[Date - Publication])) | 341 |
| Embase | ('prone position'/exp OR 'prone position' OR (prone AND ('position'/exp OR position))) AND ('covid 19'/exp OR 'covid 19') | 636 |
| Cochrane | (prone position):ti,ab,kw AND (covid-19):ti,ab,kw | 71 |

Supplementary table 2: Quality assessment of the included studies.

| Cohort studies | Selection | | | | Comparability | Outcome | | | | Quality score |
| --- | --- | --- | --- | --- | --- | --- | --- | --- | --- | --- |
| Representativeness of the exposed cohort | Selection of non-exposed cohort | Ascertainment of exposure | Demonstration that outcome of interest was not present at start of study | Comparability of the cohorts on the basis of design or analysis | Assessment of outcome | Was follow up long enough for outcomes to occur | | Adequacy of follow up cohorts |
| Ferrando, 2020 | 1 | 1 | 1 | 1 | 1 | 1 | 1 | | 1 | 8 |
| Jagan, 2020 | 1 | 1 | 1 | 1 | 1 | 1 | 0 | | 1 | 6 |
| Jouffroy, 2021 | 1 | 1 | 1 | 1 | 0 | 1 | 1 | | 1 | 7 |
| Ni, 2020 | 1 | 1 | 1 | 1 | 1 | 1 | 0 | | 1 | 7 |
| Padrao, 2020 | 1 | 1 | 1 | 1 | 1 | 1 | 0 | | 0 | 6 |
| Perez-Nieto, 2021 | 1 | 1 | 1 | 1 | 1 | 1 | 0 | | 0 | 6 |
| Prud’homme, 2021 | 1 | 1 | 1 | 1 | 1 | 1 | 0 | | 1 | 7 |
| Tonelli, 2021 | 1 | 1 | 1 | 1 | 1 | 1 | 1 | | 1 | 8 |
| Zang, 2020 | 1 | 1 | 1 | 1 | 1 | 1 | 1 | | 0 | 7 |
| Randomized controlled studies | Randomization | | | | Blinding | | | Withdrawals | | Quality score |
|  | Was the study described as randomized? | | Was the randomization appropriate? | | Was the study described as double blind? | Was the double blinding appropriate? | | Was there a description of withdrawals and dropouts? | |  |
| Ehrmann, 2021 | 1 | | 1 | | 0 | 0 | | 1 | | 3 |
| Jayakumar, 2021 | 1 | | 1 | | 0 | 0 | | 1 | | 3 |
| Johnson, 2021 | 1 | | 1 | | 0 | 0 | | 1 | | 3 |
| Rosen, 2021 | 1 | | 1 | | 0 | 0 | | 1 | | 3 |
| Taylor, 2020 | 1 | | 1 | | 1 | 1 | | 1 | | 5 |


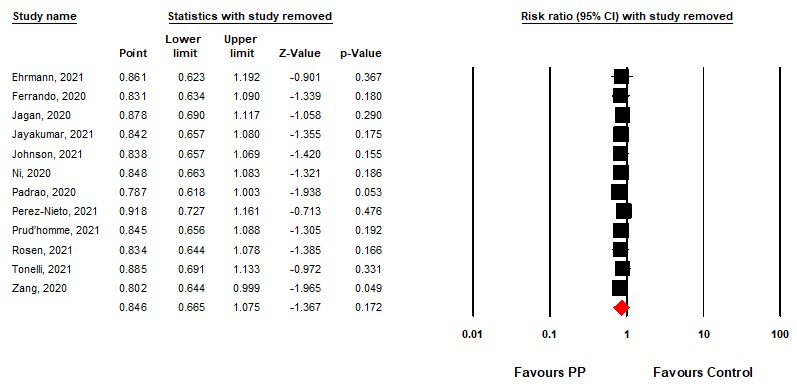


Supplementary figure 1: Sensitivity analysis for the need for endotracheal intubation.


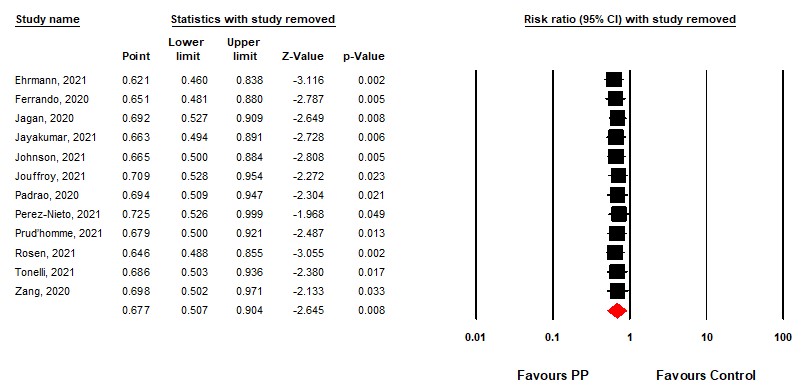


Supplementary figure 2: Sensitivity analysis for in-hospital mortality.
